# Supplementary material for: The Enhancing Effect of Stable Oxygen Functional Groups on Porous-Carbon-Supported Pt Catalysts for Alkaline Hydrogen Evolution
Source: MDPI journal article supplement (doi:10.3390/nano13081415), 2023-04-20
Supplement: s1 [file s1]

## The Enhancing Effect of Stable Oxygen Functional Groups on Porous-Carbon-Supported Pt Catalysts for Alkaline Hydrogen Evolution

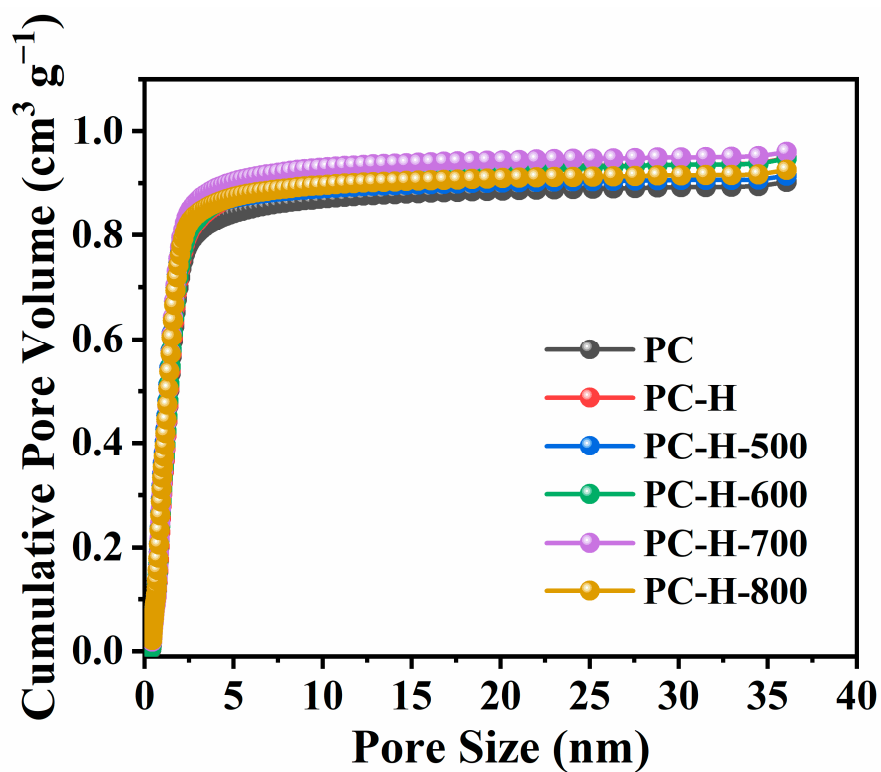

**Figure S1.** Cumulative pore volume of PC, PC-H, PC-H-500, PC-H-600, PC-H-700, and PC-H-800 supports.

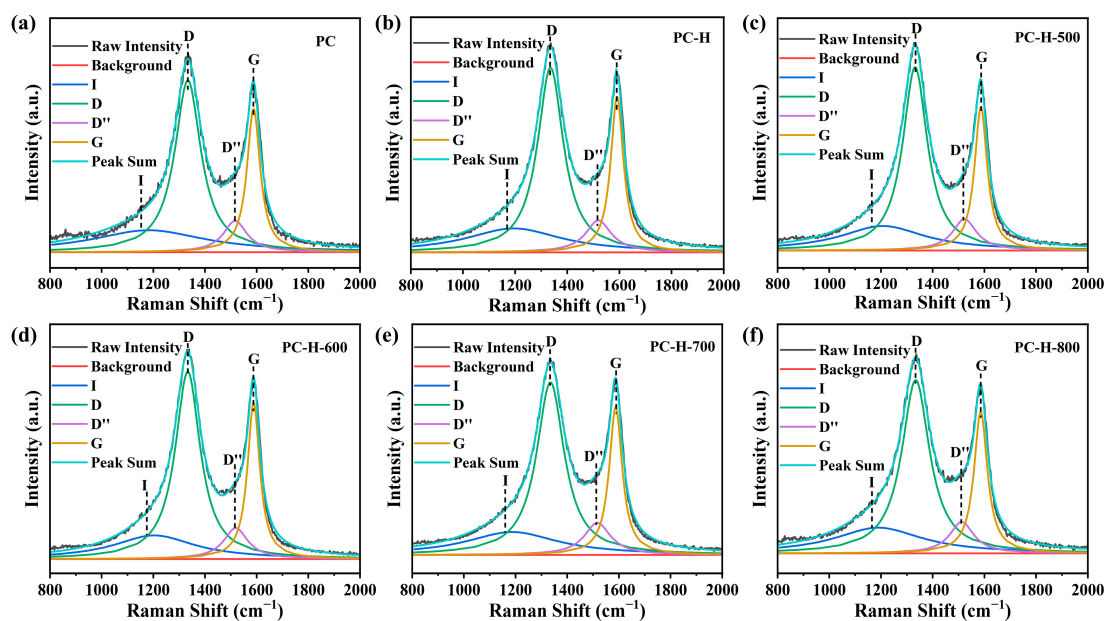

**Figure S2.** Fitted Raman spectra of the PC (a), PC-H (b), PC-H-500 (c), PC-H-600 (d), PC-H-700 (e), and PC-H-800 (f) supports.

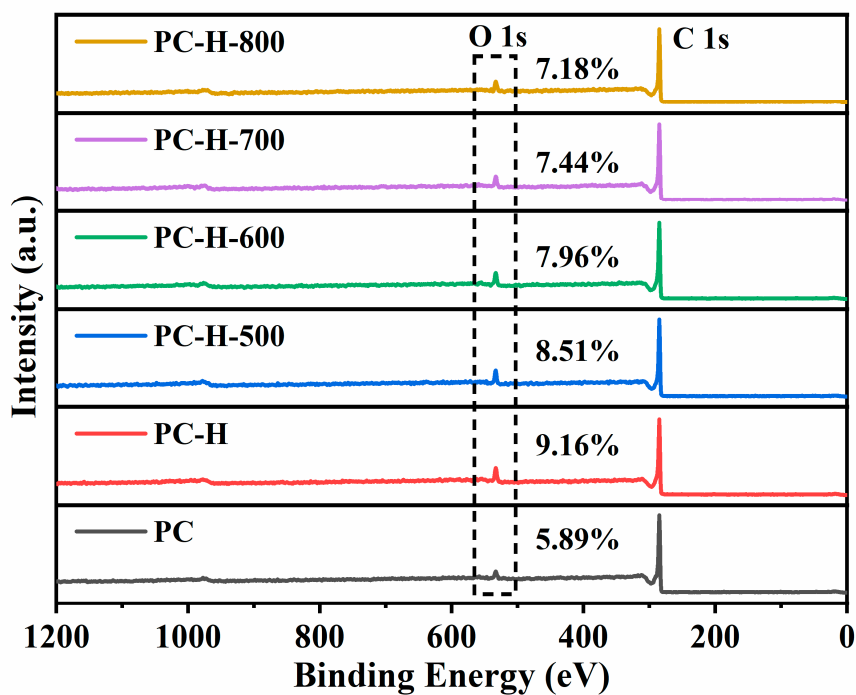

**Figure S3.** XPS surveys of PC, PC-H, PC-H-500, PC-H-600, PC-H-700, and PC-H-800.

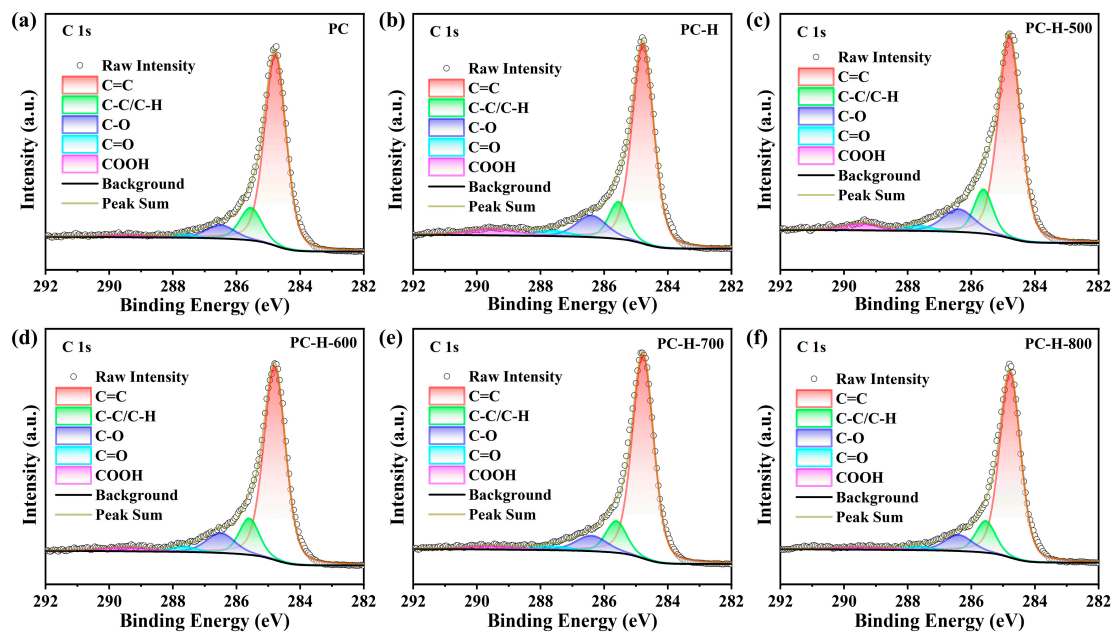

**Figure S4.** High-resolution C 1s spectra of PC (a), PC-H (b), PC-H-500 (c), PC-H-600 (d), PC-H-700 (e), and PC-H-800 (f) supports.

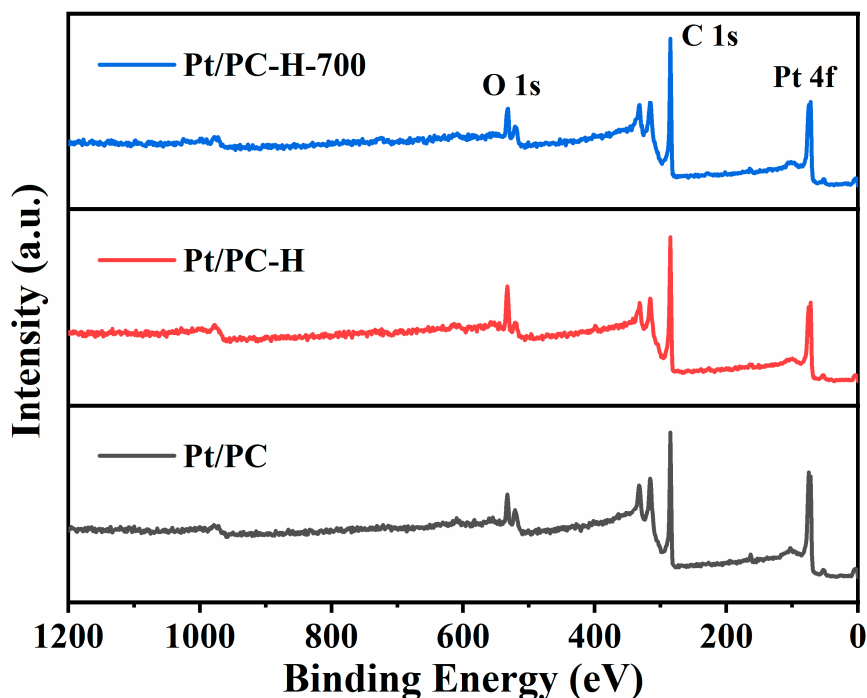

**Figure S5.** XPS surveys of Pt/PC, Pt/PC-H, and Pt/PC-H-700 catalysts.

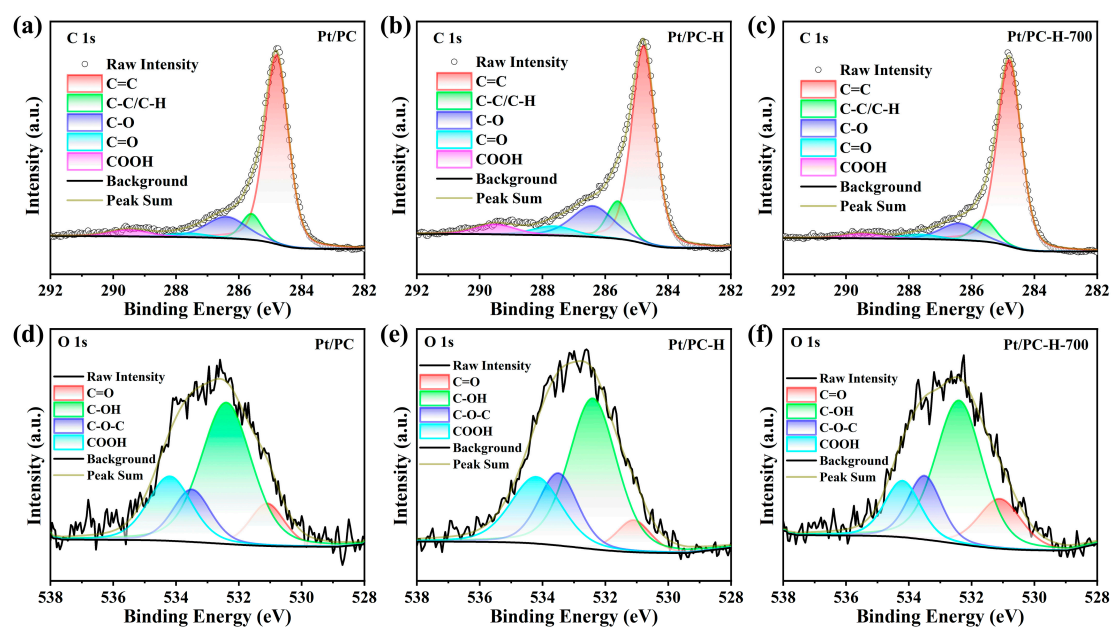

**Figure S6.** High-resolution C 1s (a-c) and O 1s (d-f) spectra of Pt/PC, Pt/PC-H, and Pt/PC-H-700 catalysts, respectively.

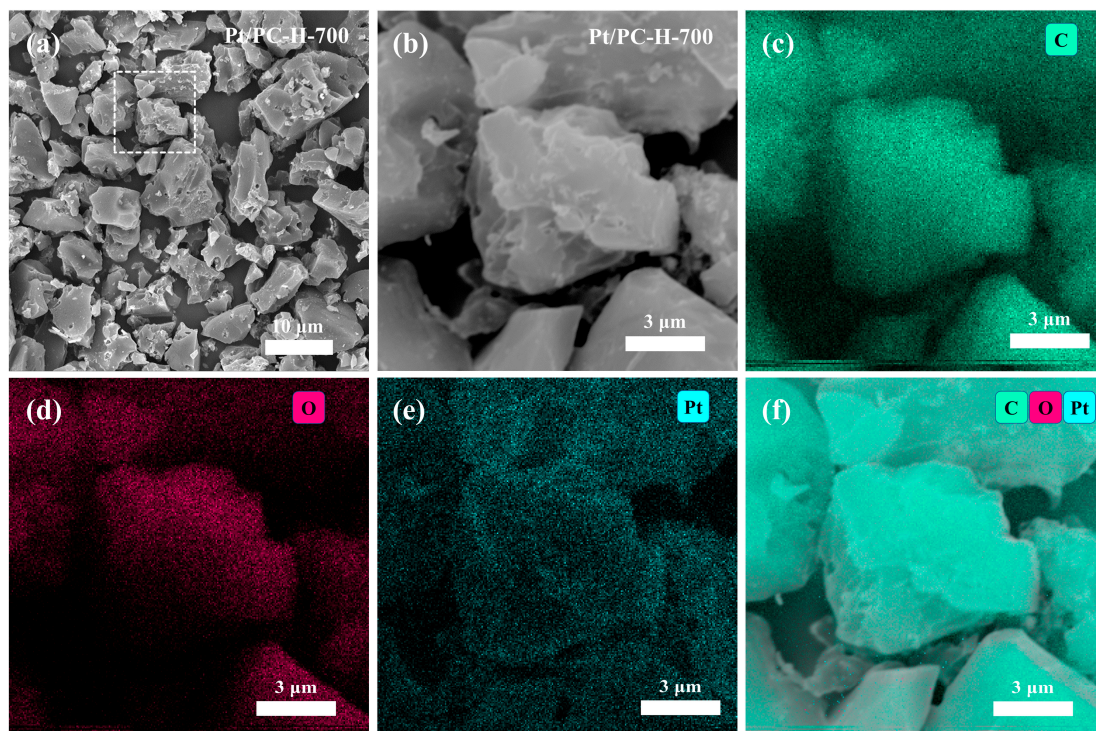

**Figure S7.** SEM images (a, b) and corresponding EDX mappings (c-f) of Pt/PC-H-700 catalyst.



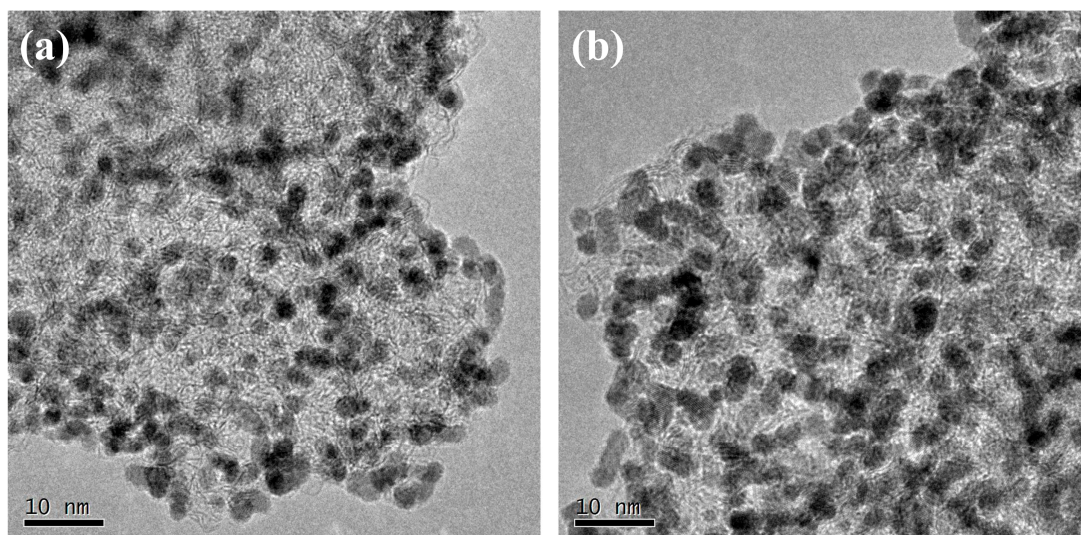

**Figure S8.** TEM images of Pt/PC (a) and Pt/PC-H-700 (b) catalysts.

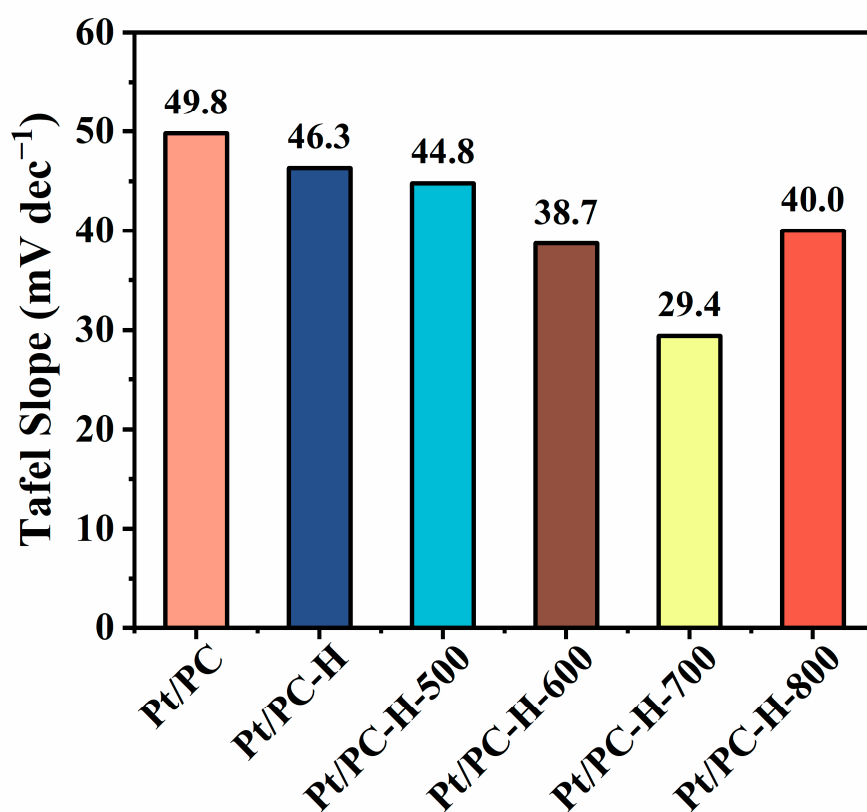

**Figure S9.** Tafel slope values of Pt/PC, Pt/PC-H, Pt/PC-H-500, Pt/PC-H-600, Pt/PC-H-700, and Pt/PC-H-800 catalysts.

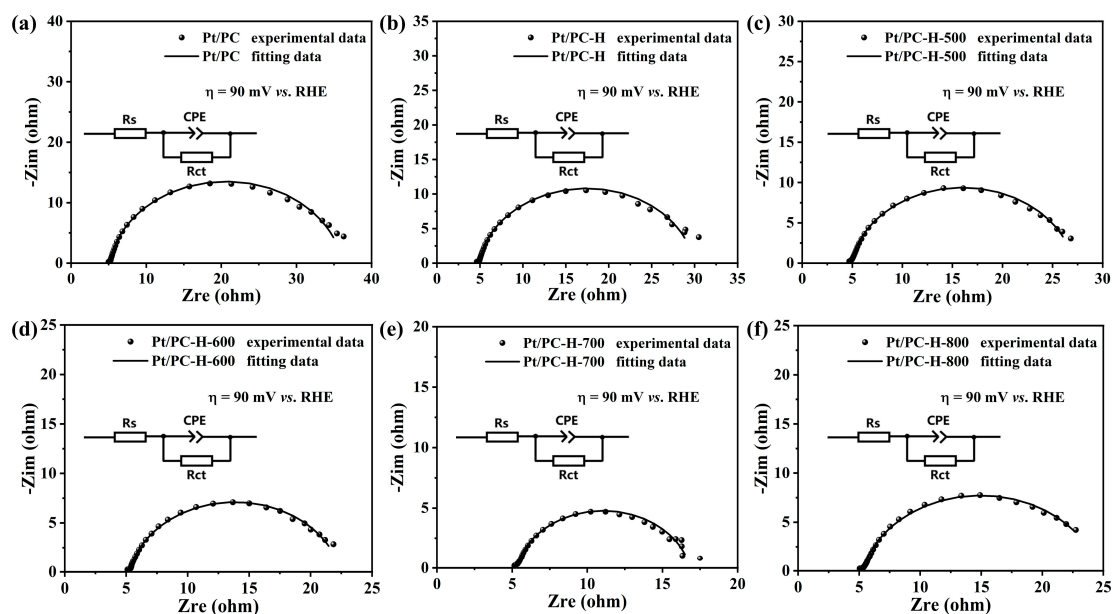

**Figure S10.** Experimental and simulated Nyquist plots of Pt/PC, Pt/PC-H, Pt/PC-H-500, Pt/PC-H-600, Pt/PC-H-700, and Pt/PC-H-800 catalysts at -90 mV (inset shows the equivalent circuit model).

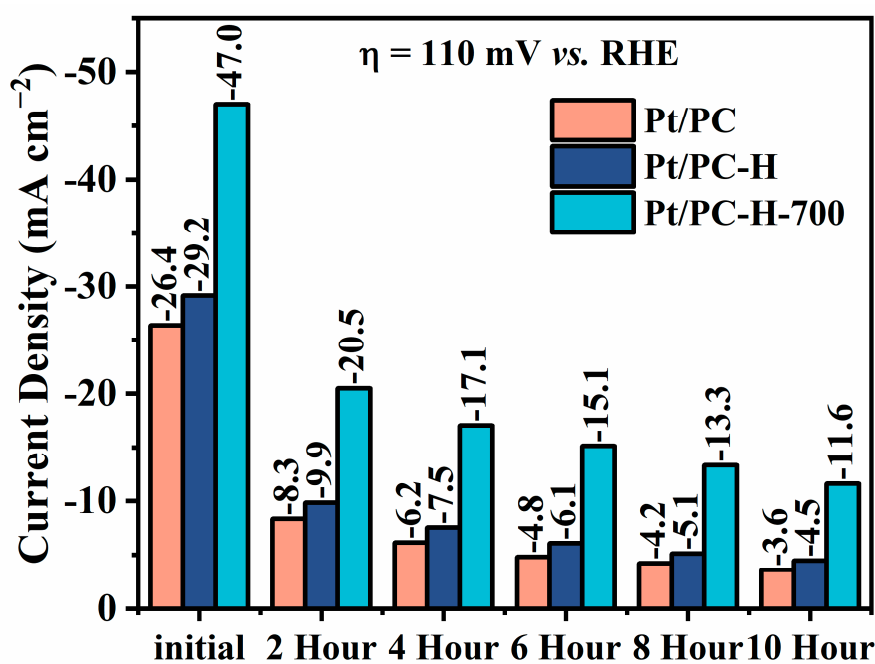

**Figure S11.** Current densities of Pt/PC, Pt/PC-H, and Pt/PC-H-700 catalysts in I-t curves at initial, 2 h, 4 h, 6 h, 8 h, and 10 h.

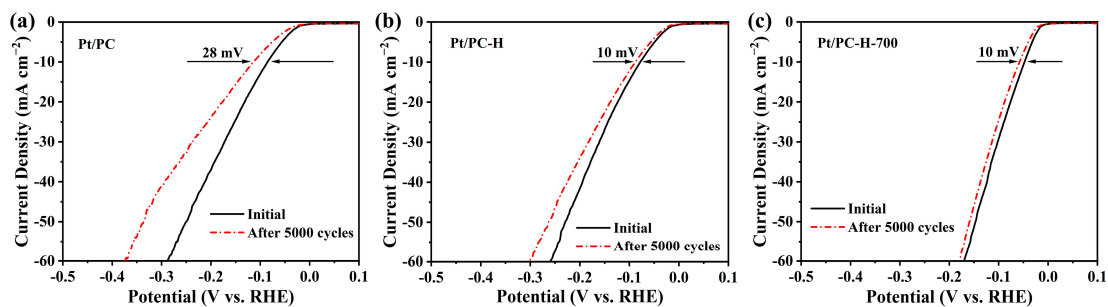

**Figure S12.** LSV curves of Pt/PC (b), Pt/PC-H (c), and Pt/PC-H-700 (d) catalysts before and after 5, 000 CV cycles.

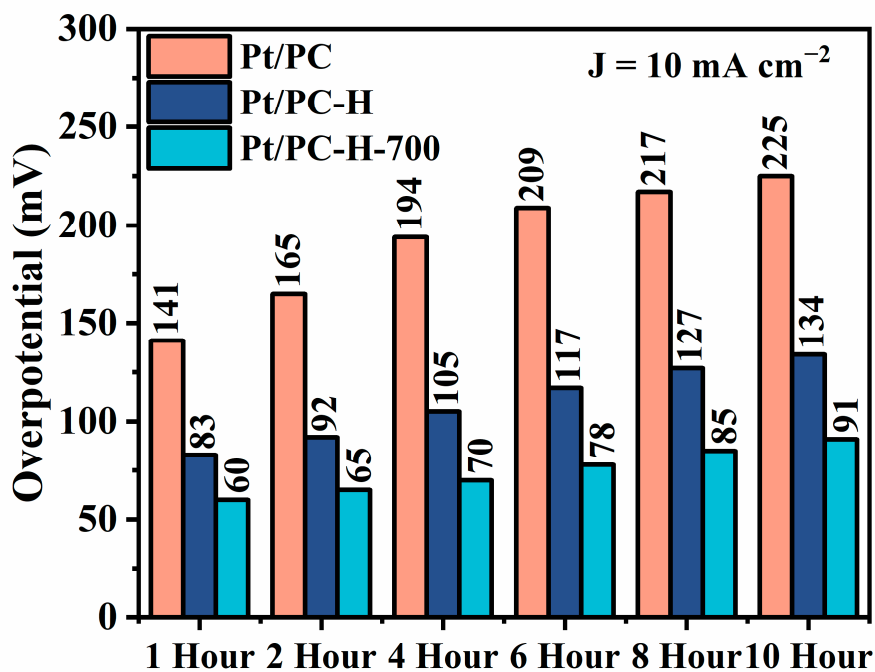

**Figure S13.** Overpotentials of Pt/PC, Pt/PC-H, and Pt/PC-H-700 catalysts in V-t curves at 1 h, 2 h, 4 h, 6 h, 8 h, and 10 h.

**Table S1.** The content percentages from the decomposed C 1s spectra of Pt/PC, Pt/PC-H, and Pt/PC-H-700 catalysts.

| Catalysts   | C=C   | C-C/C-H | C-O   | C=O  | COOH |
|-------------|-------|---------|-------|------|------|
| Pt/PC       | 71.4% | 8.1%    | 13.7% | 2.5% | 4.3% |
| Pt/PC-H     | 61.8% | 10.7%   | 16.9% | 5.1% | 5.5% |
| Pt/PC-H-700 | 75.0% | 8.4%    | 10.7% | 2.9% | 3.1% |

**Table S2.** The content percentages from the decomposed O 1s spectra of Pt/PC, Pt/PC-H, and Pt/PC-H-700 catalysts.

| Catalysts   | C=O   | C-OH  | C-O-C | COOH  |
|-------------|-------|-------|-------|-------|
| Pt/PC       | 10.9% | 53.1% | 14.9% | 21.1% |
| Pt/PC-H     | 7.4%  | 49.9% | 19.3% | 23.5% |
| Pt/PC-H-700 | 16.4% | 51.4% | 16.7% | 15.5% |

**Table S3.** The content percentages from the decomposed Pt 4f spectra of Pt/PC, Pt/PC-H, and Pt/PC-H-700 catalysts.

| Catalysts   | Pt <sup>0</sup> 4f <sub>7/2</sub> | Pt <sup>0</sup> 4f <sub>5/2</sub> | Pt <sup>2+</sup> 4f <sub>7/2</sub> | Pt <sup>2+</sup> 4f <sub>5/2</sub> | Pt <sup>4+</sup> 4f <sub>7/2</sub> | Pt <sup>4+</sup> 4f <sub>5/2</sub> |
|-------------|-----------------------------------|-----------------------------------|------------------------------------|------------------------------------|------------------------------------|------------------------------------|
| Pt/PC       | 19.3%                             | 15.2%                             | 21.7%                              | 17.1%                              | 14.9%                              | 11.7%                              |
| Pt/PC-H     | 17.4%                             | 13.7%                             | 23.2%                              | 18.3%                              | 15.4%                              | 12.1%                              |
| Pt/PC-H-700 | 19.2%                             | 15.1%                             | 22.6%                              | 17.8%                              | 14.1%                              | 11.1%                              |

**Table S4.** EIS fitting results of Pt/PC, Pt/PC-H, Pt/PC-H-500, Pt/PC-H-600, Pt/PC-H-700, and Pt/PC-H-800 catalysts.

| Catalysts   | Rs (Ohm, $\Omega$ ) | Rct (Ohm, $\Omega$ ) | Fitting error ( $\chi^2$ ) |
|-------------|---------------------|----------------------|----------------------------|
| Pt/PC       | 5.1                 | 31.0                 | 5.21E-04                   |
| Pt/PC-H     | 4.8                 | 25.1                 | 5.37E-04                   |
| Pt/PC-H-500 | 4.8                 | 22.3                 | 5.38E-04                   |
| Pt/PC-H-600 | 5.2                 | 17.2                 | 3.44E-04                   |
| Pt/PC-H-700 | 5.2                 | 11.6                 | 4.03E-04                   |
| Pt/PC-H-800 | 5.2                 | 19.4                 | 5.77E-04                   |
